EDITORIAL

# *PLOS Neglected Tropical Diseases* 2015 Reviewer Thank You

The Public Library of Science (PLOS) and the *PLOS Neglected Tropical Diseases* (*PLOS NTDs*) editorial team would like to express our tremendous gratitude to all individuals who participated in the peer review process for *PLOS NTDs* this past year. As a community run journal, we depend on the participation of active and expert members of the field to communicate the best work. 2015 was great year for *PLOS NTDs*; this year, over 2,400 reviewers from around the world helped evaluate over 1,200 articles.

The names of our 2015 reviewers are listed in [S1 Reviewer List](#). Thank you to all our reviewers for sharing your expertise with the *PLOS NTDs* community. Your efforts are an important part of making the journal a highly read, highly cited and highly regarded open access resource created by and for the benefit of the scientific community.

## Supporting Information

**S1 Reviewer List. Alphabetical list of 2015 *PLOS NTDs* reviewers.**  
(PDF)

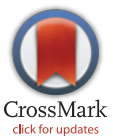

## Reference

1. (2015) *PLOS Neglected Tropical Diseases* 2014 Reviewer Thank You. *PLoS Negl Trop Dis* 9(2): e0003621. doi: [10.1371/journal.pntd.0003621](https://doi.org/10.1371/journal.pntd.0003621)

## OPEN ACCESS

**Citation:** (2016) *PLOS Neglected Tropical Diseases* 2015 Reviewer Thank You. *PLoS Negl Trop Dis* 10(2): e0004520. doi: [10.1371/journal.pntd.0004520](https://doi.org/10.1371/journal.pntd.0004520)

**Published:** February 23, 2016

**Copyright:** © 2016 The PLOS Neglected Tropical Diseases Staff. This is an open access article distributed under the terms of the [Creative Commons Attribution License](#), which permits unrestricted use, distribution, and reproduction in any medium, provided the original author and source are credited.

**Funding:** The author(s) received no specific funding for this work.

**Competing Interests:** The authors have declared that no competing interests exist.
